# Supplementary material for: Phosphoserine Aminotransferase1 Is Part of the Phosphorylated Pathways for Serine Biosynthesis and Essential for Light and Sugar-Dependent Growth Promotion
Source: PubMed Central journal article supplement (PMC6256069; doi:10.3389/fpls.2018.01712), 2018-11-20
Supplement: Data_Sheet_1.pdf [file Data_Sheet_1.pdf]

## SUPPLEMENTAL FIGURES

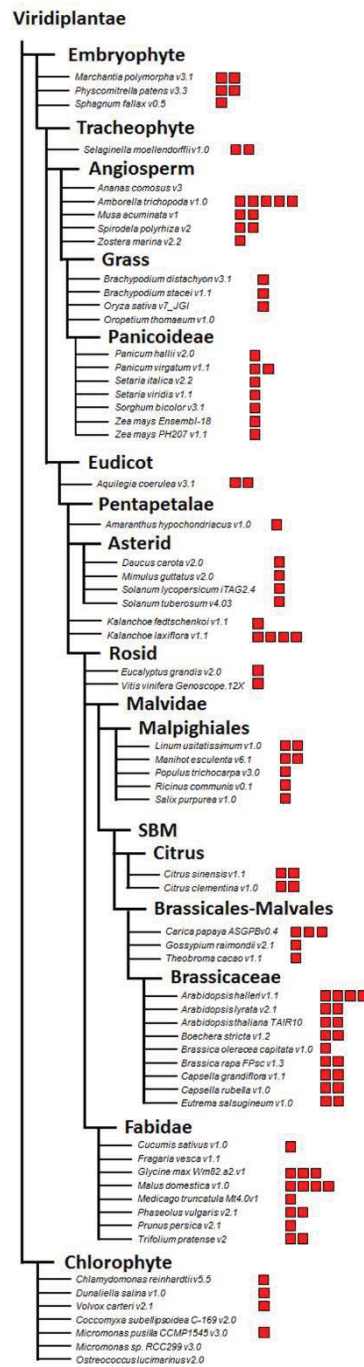

**Supplemental Figure 1: Presence of the *PSAT* genes in the clade *Viridiplantae***

The presence of the *PSAT* genes in the clade *Viridiplantae* is shown. Red boxes indicate the number of *PSAT* isoforms.

#### Detailed view of selected perturbations (absolute expression levels)

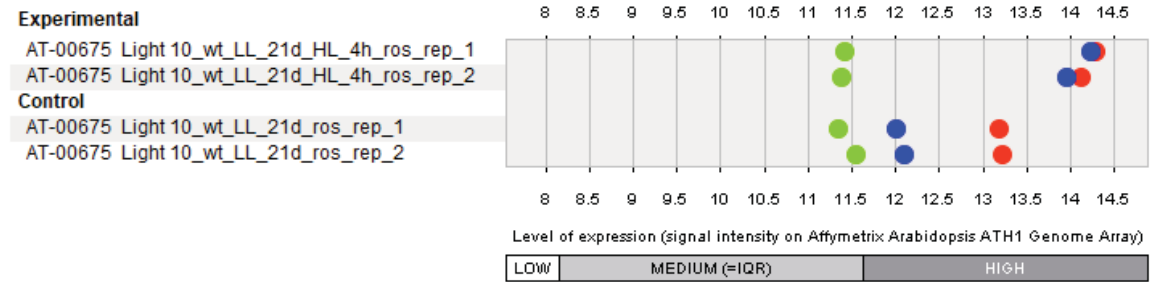

created with GENEVESTIGATOR

#### Supplemental Figure 2: High-light-induced expression of PPSB genes

Public available gene expression data are shown (<https://genevestigator.com/gv/>). The expression of *PGDH1* (red), *PSAT1* (blue) and *PSP* (green) is shown in shoot tissue of wild type plants grown for three weeks on soil under 16h low-light ( $30 \mu\text{mol}_{(\text{photons})} \text{m}^{-2} \text{s}^{-1}$ ) at  $22^\circ\text{C}$  / 8h dark at  $18^\circ\text{C}$  cycles, then exposed to high-light (16h ( $300 \mu\text{mol}_{(\text{photons})} \text{m}^{-2} \text{s}^{-1}$ ) at  $22^\circ\text{C}$  / 8h dark at  $18^\circ\text{C}$ ) for 48h. The plants were shifted to high-light 3.5h after the beginning of the light period.

### Detailed view of selected perturbations (absolute expression levels)

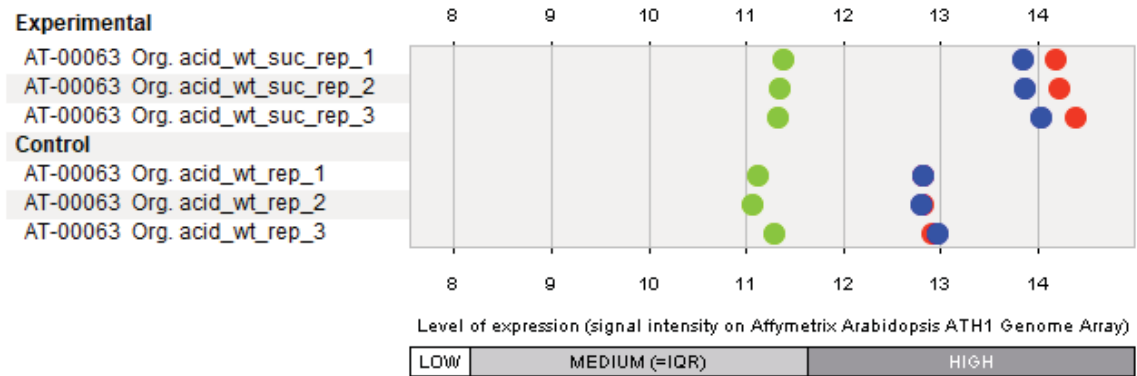

created with GENEVESTIGATOR

### Supplemental Figure 3: Sucrose-induced expression of PPSB genes

Publicly available gene expression data are shown (<https://genevestigator.com/gv/>). The expression of *PGDH1* (red), *PSATI* (blue) and *PSP* (green) is shown in seedlings of wild type plants grown on agar plates with (100 mM) or without exogenous sucrose for 3 days.
